# Supplementary material for: LIK1, A CERK1-Interacting Kinase, Regulates Plant Immune Responses in Arabidopsis
Source: PubMed Central journal article supplement (PMC4103824; doi:10.1371/journal.pone.0102245), 2014-07-18
Supplement: pone.0102245.s001.pdf [file pone.0102245.s001.pdf]

(A)

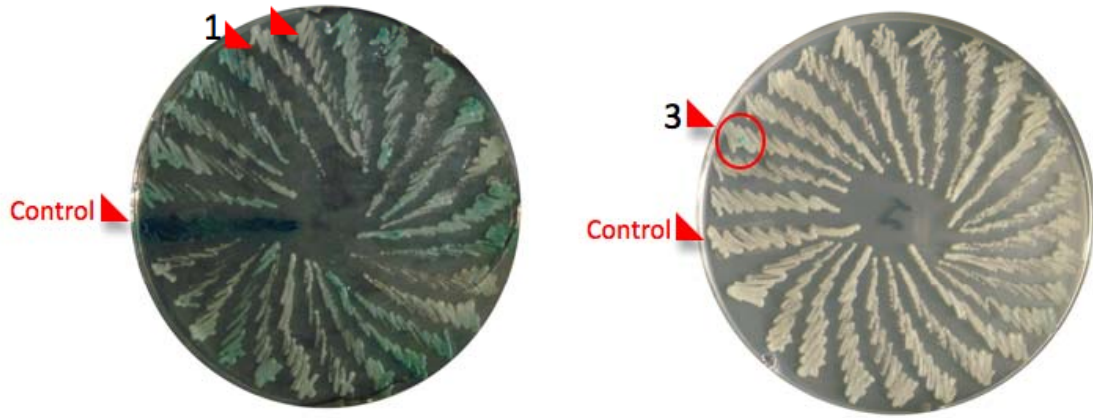

(B)

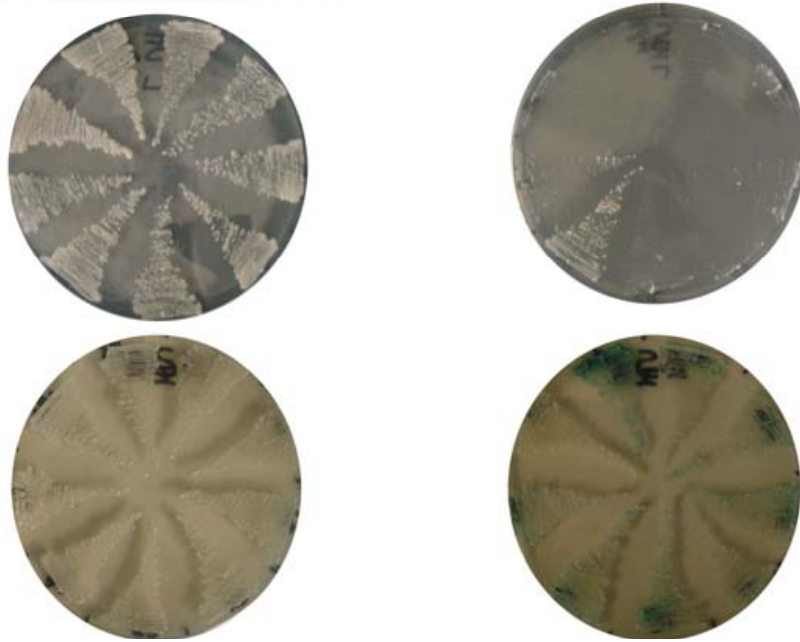

(C)

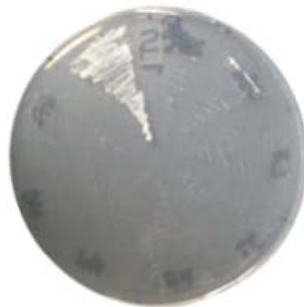

## Figure S1. Procedure of Y2H screening for proteins interacting with the AtCERK1

### (A) Testing for interaction with the galactose-dependent *lacZ* reporter gene

Colonies growing on selection medium Gal(UTHL)<sup>-</sup> were streaked onto selection medium Gal-X gal-(UTH)<sup>-</sup> (left panel) and Glc-X gal (UTH)<sup>-</sup> (right panel) to test for the ability to activate galactose-dependent LacZ expression. Images were acquired one week after colony streaking. Eg. (1) and (2) did not turn blue on the Gal-X gal-(UTH)<sup>-</sup> medium, indicating that there is no protein interacting with the kinase domain of CERK1 (K1) to activate LacZ expression. In addition, (3) is a false positive clone because the colony turned blue on X gal medium regardless of carbon source (the *lacZ* gene is under a Gal promoter).

### (B) Testing of individual interactors with CERK1

Individual plasmids were re-transformed into the EGY48 strain containing the bait and reporter genes. Colonies growing on Gal(UTHL)<sup>-</sup> were streaked onto selection medium (From left to right, top to bottom Gal(UTHL)<sup>-</sup>, Glc(UTHL)<sup>-</sup>, Gal-Xgal-(UTH)<sup>-</sup> and Glc-Xgal-(UTH)<sup>-</sup>).

### (C) Testing for self-activation of putative interactors

Confirmed putative interactor plasmids were transformed into EGY48 containing reporter genes. Colonies growing on (UT)<sup>-</sup> medium were streaked onto Gal (UTL)<sup>-</sup> medium. The images were acquired one week after plating.
