# Supplementary material for: LIK1, A CERK1-Interacting Kinase, Regulates Plant Immune Responses in Arabidopsis
Source: PubMed Central journal article supplement (PMC4103824; doi:10.1371/journal.pone.0102245), 2014-07-18
Supplement: pone.0102245.s002.pdf [file pone.0102245.s002.pdf]

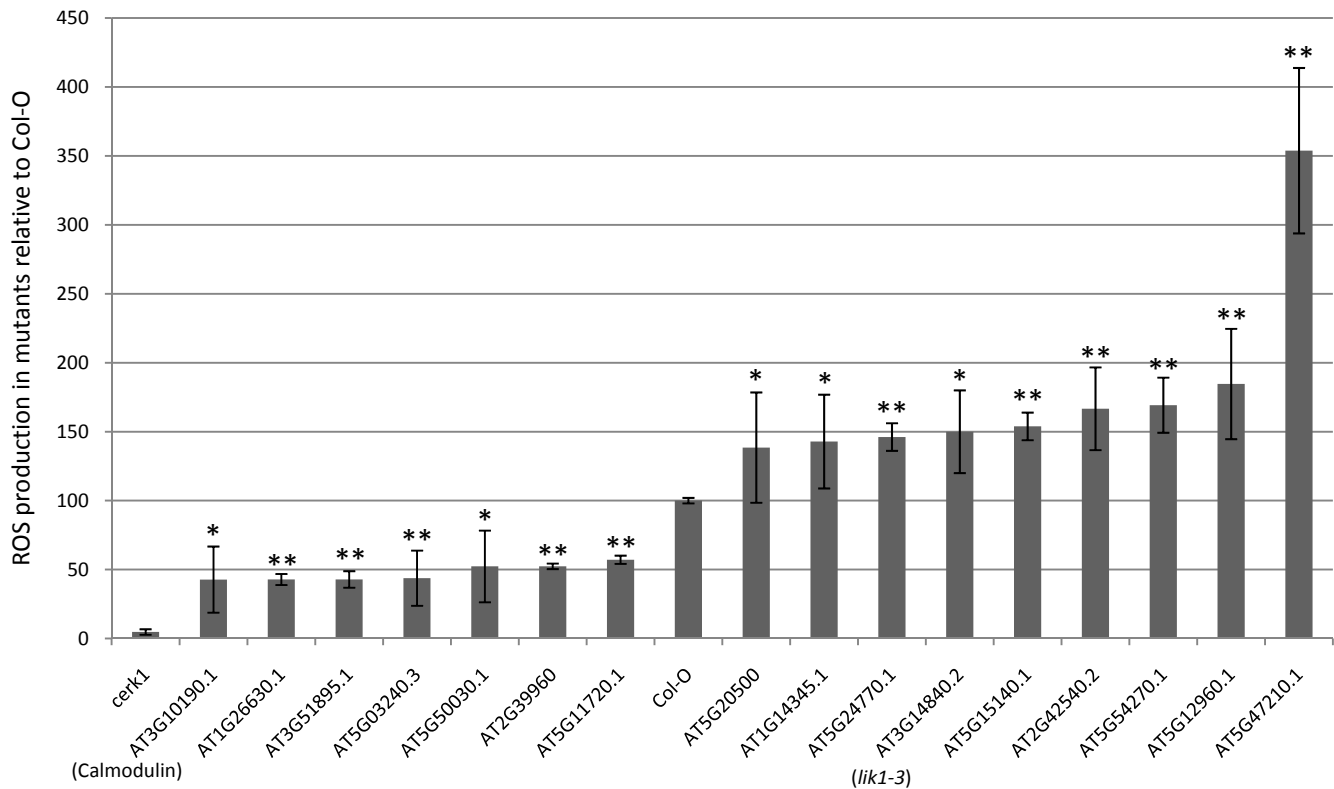

**Figure S2. T-DNA mutants with altered chitin-induced ROS production.**

ROS production by selected T-DNA insertion mutants after treatment with chitin. ROS production was measured 20 seconds before and after the maximum signal recorded. The data are the average ratio (%) of the ROS signal from 16 seedlings of each mutant compared with the Col-O wild type (100%). These experiments were performed three times, and each replicate gave similar results. Bars represent standard deviations. Student T-test (\*)  $P < 0.05$ , (\*\*)  $P < 0.01$ .
