# Supplementary material for: LIK1, A CERK1-Interacting Kinase, Regulates Plant Immune Responses in Arabidopsis
Source: PubMed Central journal article supplement (PMC4103824; doi:10.1371/journal.pone.0102245), 2014-07-18
Supplement: pone.0102245.s005.pdf [file pone.0102245.s005.pdf]

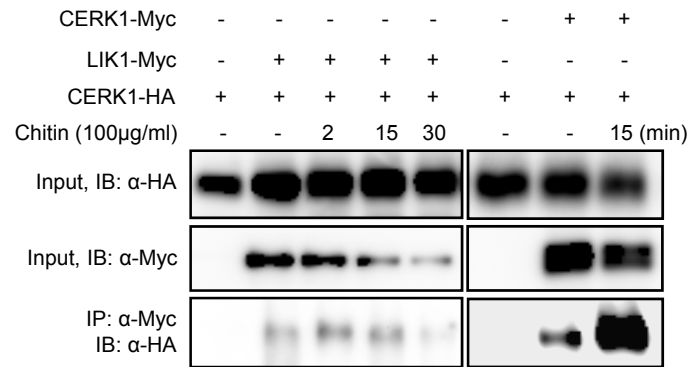

Figure S5. Second example (see also Figure 1A) of association between CERK1 and LIK1 in protoplasts.
