# Supplementary material for: LIK1, A CERK1-Interacting Kinase, Regulates Plant Immune Responses in Arabidopsis
Source: PubMed Central journal article supplement (PMC4103824; doi:10.1371/journal.pone.0102245), 2014-07-18
Supplement: pone.0102245.s006.pdf [file pone.0102245.s006.pdf]

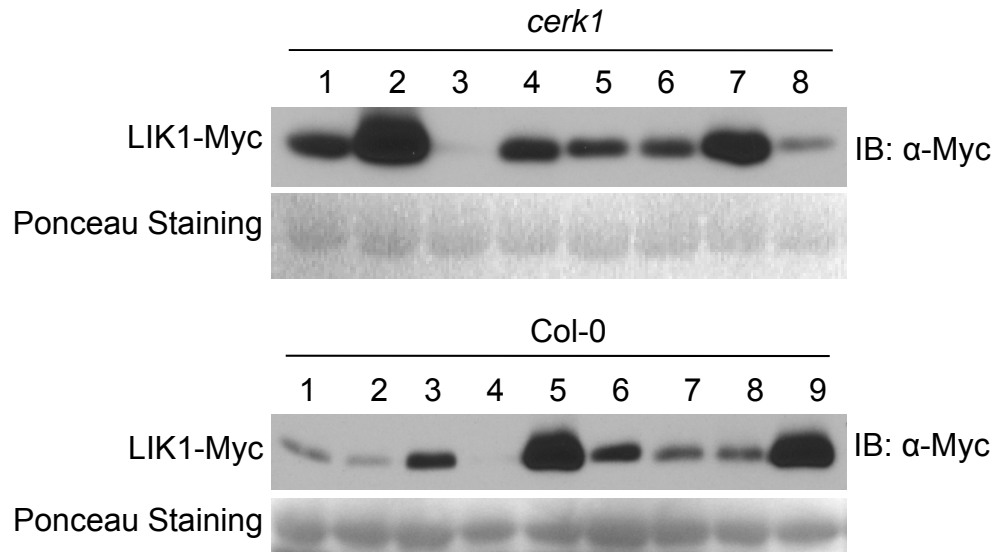

Figure S6. Expression of *LIK1* in transgenic *Arabidopsis cerk1* mutant and Col-0 wild type plants determined by western blotting.
